# Supplementary material
Source: PubMed Central journal article supplement (PMC5404601)
Supplement: AAC.02555-16_zac005176110s1.pdf [file AAC.02555-16_zac005176110s1.pdf]

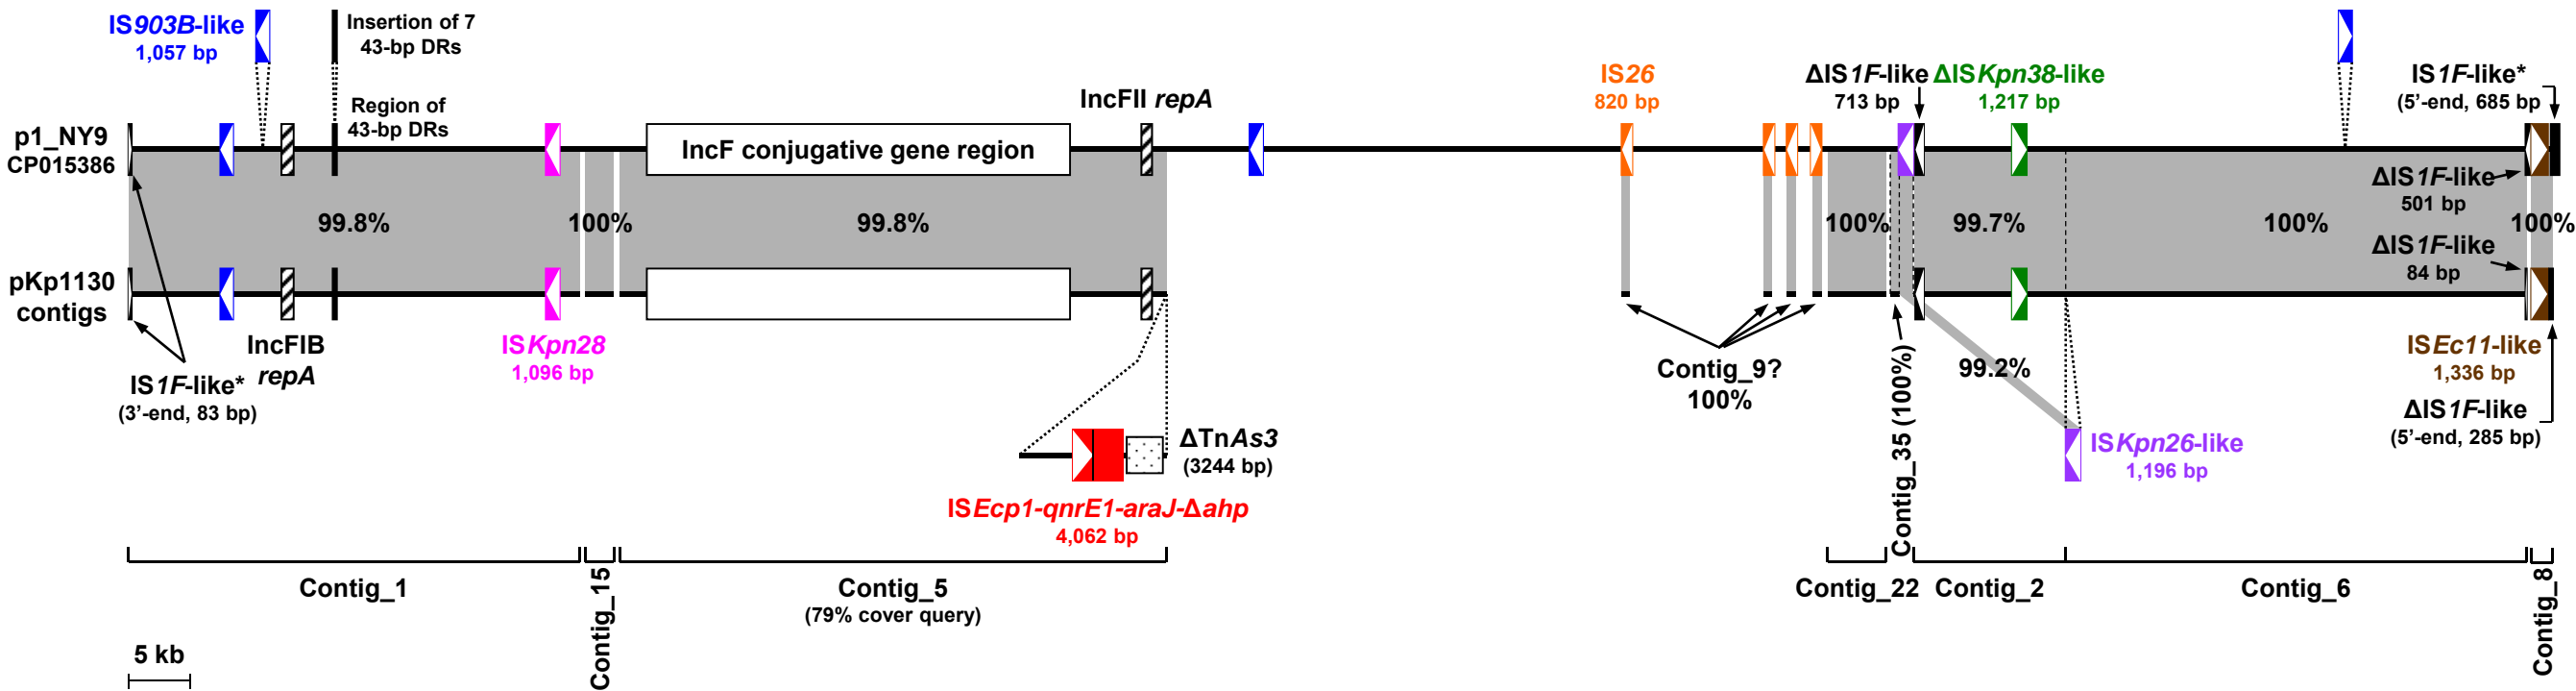

**FIG. S1.** Comparison of the contigs of pKp1130 with the plasmid p1 of *K. pneumoniae* NY9 (199,497 bp; GenBank accession number CP015386). In the BLAST analysis of the complete set of 14 pKp1130 contigs, the p1\_NY9 sequence was the GenBank entry that showed high similarity scores with the largest number (9) of contigs (shown in the figure). DNA sequences are represented by thick horizontal lines. The regions of p1\_NY9 sharing high identity with the pKp1130 contigs are indicated by grey-shaded areas and the corresponding % of identity is shown. Relevant genetic features shown are: genes encoding plasmid replication proteins (diagonally hatched bars); the following color-coded insertion sequences (white triangles indicate the sense of *tnpA* transcription): blue, IS903B-like; fuchsia, ISKpn28; red, ISEcp1; orange, IS26; violet, ISKpn26-like; black, IS1F-like (the asterisks indicate consecutive fragments); green, ISKpn38-like and brown, ISEc11-like, and regions containing 43-bp-long direct repeats (DRs, thick vertical lines); genes encoding functions for conjugative plasmid transference (white boxes); a Tn3 family truncated transposon TnAs3 ( $\Delta$ TnAs3, dotted box), and the *qnrE1*-containing region mobilized by ISEcp1 (red box). DNA insertions are indicated by dotted lines. The Contig\_5 was the unique that showed a cover query <100%. Both the position and orientation, as well as the number of copies of Contig\_9 in pKp1130 could not be unequivocally determined because it comprises an IS26 fragment and four copies of this insertion sequence were found in p1\_NY9. Considering the remaining 5 contigs of pKp1130 that did not show a relevant similarity to p1\_NY9, three of them displayed the best BLAST hits with plasmids of *Serratia marcescens*, *Yersinia pestis* or *Shigella dysenteriae*, respectively, while the other two comprised an IS2 or a *dhfrVIII* gene<sup>1</sup>, respectively.

1. Sundström L, Jansson C, Bremer K, Heikkilä E, Olsson-Liljequist B, Sköld O. 1995. A new *dhfrVIII* trimethoprim-resistance gene, flanked by IS26, whose product is remote from other dihydrofolate reductases in parsimony analysis. *Gene* **154**:7–14.

**A**

|              | <i>qnrA</i> | <i>qnrB</i> | <i>qnrC1</i> | <i>qnrD</i> | <i>qnrS</i> | <i>qnrVC</i> | <i>qnrE1</i> |
|--------------|-------------|-------------|--------------|-------------|-------------|--------------|--------------|
| <i>qnrA</i>  |             | 48.8        | 59.5         | 48.4        | 59.0        | 60.2         | 50.3         |
| <i>qnrB</i>  | 51.2        |             | 49.4         | 63.1        | 50.2        | 51.0         | 75.0         |
| <i>qnrC1</i> | 40.5        | 50.6        |              | 49.6        | 61.2        | 69.3         | 47.9         |
| <i>qnrD</i>  | 51.6        | 36.9        | 50.4         |             | 47.9        | 51.6         | 63.0         |
| <i>qnrS</i>  | 41.0        | 49.8        | 38.8         | 52.1        |             | 64.5         | 49.8         |
| <i>qnrVC</i> | 39.8        | 49.0        | 30.7         | 48.4        | 35.5        |              | 51.1         |
| <i>qnrE1</i> | 49.7        | 25.0        | 52.1         | 37.0        | 50.2        | 48.9         |              |

**B**

|                |                |                 |              |                |        |              |                           |
|----------------|----------------|-----------------|--------------|----------------|--------|--------------|---------------------------|
|                | 10             | 20              | 30           | 40             | 50     | 60           | 70                        |
| <i>qnrBcon</i> | ATGR           | SWCTDGYRYTV     | RNDGCGWVAAAA | TTRRCAGRAABHGN | TTCAC  | YRKGHR       | AAAAARTYGAWARYR           |
| <i>qnrE1</i>   | .....          | G..A..T..T..A.. | .....        | A..TC..T..     | .....  | A.....       | A..G.....A..              |
|                | 80             | 90              | 100          | 110            | 120    | 130          | 140                       |
| <i>qnrBcon</i> | CDTTTTTYWVHT   | GTGATTTTT       | CRGGRNRC     | SGAYHTN        | WGYR   | GYACTGAR     | TTTATYGGCTGYCARTTHTATGA   |
| <i>qnrE1</i>   | TC.....CG..... | .....C.....     | .....        | .....          | .....  | .....        | .....                     |
|                | 150            | 160             | 170          | 180            | 190    | 200          | 210                       |
| <i>qnrBcon</i> | TCGHGARAGY     | CARAAAAGV       | KGYAAW       | TTYAGY         | CGYRCD | AWVYTR       | ARRGATRCYATTTTTYAAAAAGYWG |
| <i>qnrE1</i>   | G..G.....      | G..G.....       | .....C.....  | A..G.....      | G..... | .....T.....  | .....                     |
|                | 220            | 230             | 240          | 250            | 260    | 270          | 280                       |
| <i>qnrBcon</i> | YTMTCMATGGY    | NGRITTYM        | GVAAAYD      | VARYGC         | NYTKGR | HATHGAR      | ATTHSYCAYTYG              |
| <i>qnrE1</i>   | .....G.....    | .....           | .....        | .....          | .....  | .....        | .....                     |
|                | 290            | 300             | 310          | 320            | 330    | 340          | 350                       |
| <i>qnrBcon</i> | CRGATTTY       | CGCGGY          | GC           | VAGY           | TTYAT  | GAA          | YATGATYAYYAYNCGN          |
| <i>qnrE1</i>   | .C.....        | G.....          | .....        | .....          | .....  | .....        | .....                     |
|                | 360            | 370             | 380          | 390            | 400    | 410          | 420                       |
| <i>qnrBcon</i> | BARYWCM        | AAAYTR          | WSYTAY       | GCCAA          | YTTTT  | CD           | AARGYHGT                  |
| <i>qnrE1</i>   | A..A..G..      | .....           | .....        | .....          | .....  | .....        | .....                     |
|                | 430            | 440             | 450          | 460            | 470    | 480          | 490                       |
| <i>qnrBcon</i> | TGGATRGG       | DRCYCAG         | RTRVYK       | GGBR           | CRACG  | TTBAG        | TGGWTCV                   |
| <i>qnrE1</i>   | .....          | A..C..C..G..... | .....        | C.....         | G..... | .....        | .....                     |
|                | 500            | 510             | 520          | 530            | 540    | 550          | 560                       |
| <i>qnrBcon</i> | TCGACTGG       | CGRR            | CVGS         | RAA            | YKTH   | ACRC         | AYTYG                     |
| <i>qnrE1</i>   | G.....         | .....           | C.....       | C.....         | .....  | .....        | .....                     |
|                | 570            | 580             | 590          | 600            | 610    | 620          | 630                       |
| <i>qnrBcon</i> | BVKNGT         | NGATTT          | RCAR         | GGH            | GT     | YA           | ARYTR                     |
| <i>qnrE1</i>   | .....          | A.....          | .....        | .....          | .....  | C..A..T..... | .....                     |
|                | 640            |                 |              |                |        |              |                           |
| <i>qnrBcon</i> | GCKRT          | NATK            | GGH          | TRR            |        |              |                           |
| <i>qnrE1</i>   | .....          | G..A.....       | .....        | .....          | .....  | .....        | .....                     |

**FIG. S2.** Comparison of *qnr* genes. **(A)** Paired comparisons of *qnr* families and *qnrE1*. Averages of the % of identity (upper triangle), or the % of nucleotide difference (lower triangle), are shown. The maximal % of identity and the minimal % of difference are indicated in red. **(B)** Sequence alignment of *qnrE1* and a consensus (*qnrBcon*) of all the *qnrB* alleles previously known (accession numbers are indicated in Table S2). Dots indicate nucleotide identities. The consensus was done considering all the different nucleotides found in a given position for all the *qnrB* alleles and the variants found are indicated by the corresponding IUPAC codes for nucleotide mixtures (2, 3 and 4 nucleotides, blue, orange and fuchsia, respectively). The nucleotide changes of *qnrE1* located in positions fully conserved among all the *qnrB* alleles previously described are highlighted with a green background.

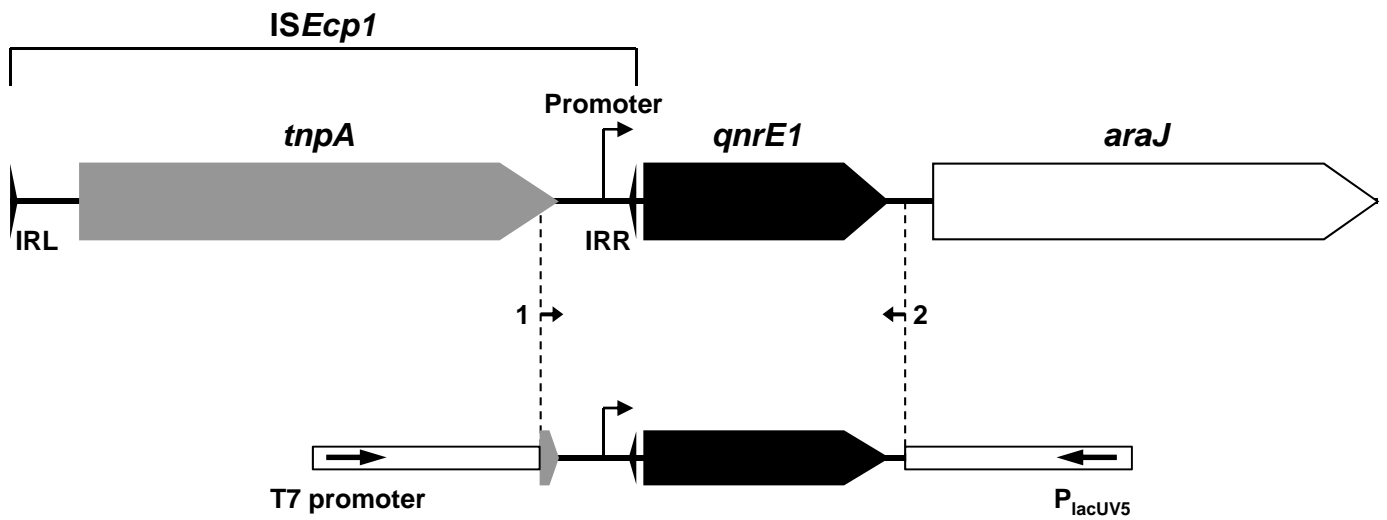

**FIG. S3.** Genetic context of *qnrE1*. A region of 3,619 bp of the Contig\_5 of pKp1130 (see Fig. S1) is depicted. The horizontal square bracket indicates *ISEcp1* (100% identical to GenBank accession number AJ242809). Genes are represented by arrow-shaped boxes. The black triangles indicate the inverted repeats of *ISEcp1* (IRL and IRR), and the promoter located next to the IRR, which likely accounted for the expression of *qnrE1*, is marked. The numbered arrows indicate the binding sites of the primers *ISEcp1*-Fout and pQNR1130-comp-R (1 and 2, respectively, see Table S1), which were used to completely amplify *qnrE1*. The 965-bp-long amplicon obtained with these primers is depicted between vertical dashed lines, and the multiple cloning site of the vector pJET1.2/blunt, where this fragment was cloned to give pJET1.2-1130, is represented by horizontal empty boxes (not drawn to scale). The vector promoters, T7 and P<sub>lacUV5</sub>, and their transcriptional senses are indicated by arrows.

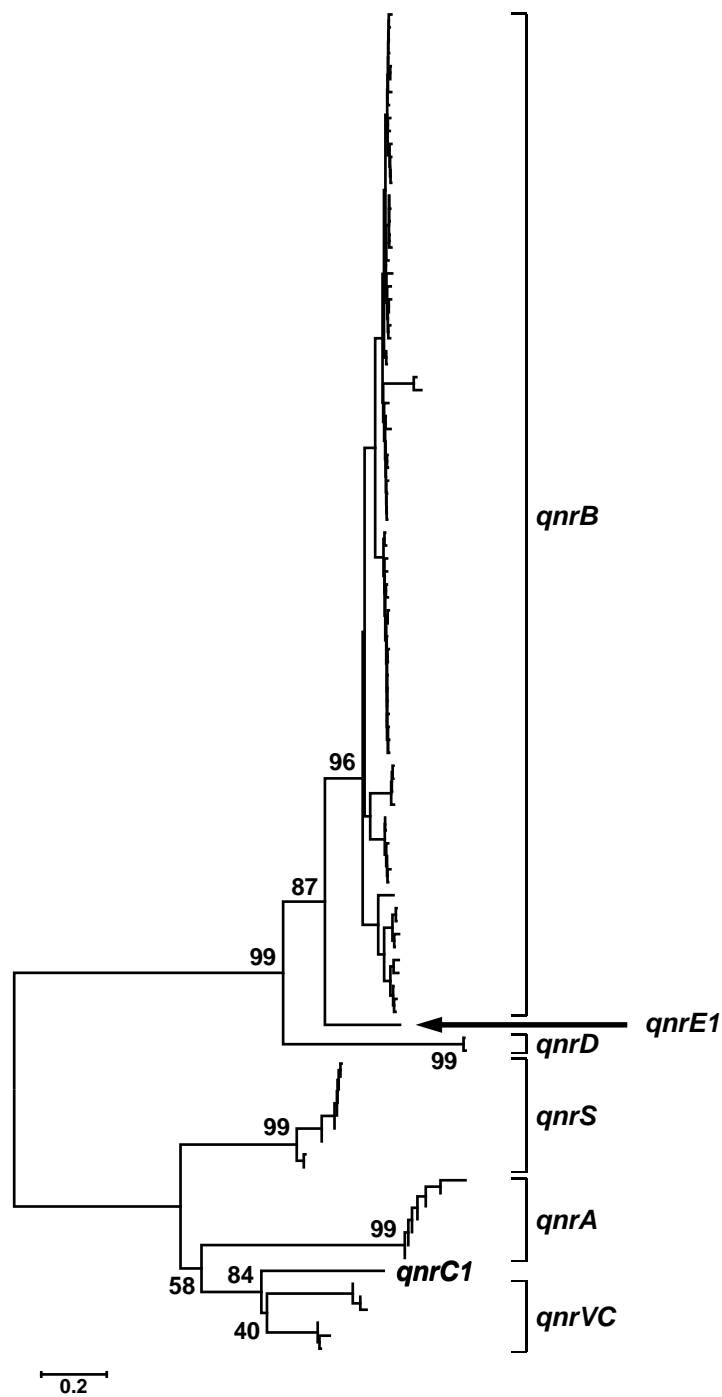

**FIG. S4.** NJ tree generated from an alignment of *qnrE1* and all the *qnr* alleles currently known (accession numbers are indicated in Table S2). For simplicity, the taxa names of *qnr* alleles were excluded (see Table S3) and only the bootstrap percentages (over 1,000 replicates) for relevant nodes are shown. The clustering of the alleles for each *qnr* family is indicated with square brackets at the right. The branch lengths were drawn to the scale shown, which indicates number of substitutions/site..

**TABLE S1.** PCR primers used in this study. The primer pair used in each PCR assay (1) is indicated by a different background.

| Target                                                                                                     | Primer <sup>a</sup> | Sequence (5'-3')       | Temp <sup>b</sup> |
|------------------------------------------------------------------------------------------------------------|---------------------|------------------------|-------------------|
| <b>Screening of <i>qnrVC</i> genes:<sup>c</sup></b>                                                        |                     |                        |                   |
| <i>qnrVC1</i> , <i>qnrVC3</i> and <i>qnrVC6</i>                                                            | qnrVC136-F          | GTGAACTTCTCACATCAGGACT | 55°C              |
|                                                                                                            | qnrVC136-R          | GCCACGAGCATATTTTACACC  |                   |
| <i>qnrVC4</i> , <i>qnrVC5</i> and <i>qnrVC7</i>                                                            | qnrVC457-F          | CACATCAAGACATGAGTGGTCA | 55°C              |
|                                                                                                            | qnrVC457-R          | GCCACGAACAGATTTTACACC  |                   |
| <b>Complete amplification/Sanger sequencing of <i>qnrE1</i>:</b>                                           |                     |                        |                   |
| <i>tnpA</i> of ISEcp1C                                                                                     | ISEcp1-Fout         | GGAAAAC TATCCGTACAAGG  | 52°C              |
| Region between <i>qnrE1</i> and <i>araJ</i>                                                                | pQNR1130-comp-R     | GGCTGACAGGTTAATCCATT   |                   |
| <b>Amplification/Sanger sequencing of the vicinities of the <i>ahp</i> interruption point:<sup>d</sup></b> |                     |                        |                   |
| <i>araJ</i>                                                                                                | araJ-F              | GACCTCGCTGTTGATGTATG   | 55°C              |
| Resolvase-encoding gene located upstream of $\Delta$ <i>ahp</i>                                            | R2                  | AAGTGTTTGCGCTCGATGTC   |                   |

<sup>a</sup> F, forward; R, reverse.

<sup>b</sup> Annealing temperature used in the corresponding PCR assay.

<sup>c</sup> Given the broad genetic difference among the *qnrVC* alleles, two PCR assays were implemented for the screening of all the members of this family.

<sup>d</sup> An amplicon of 663 bp was generated.

## References

1. Melano R, Corso A, Petroni A, Centrón D, Orman B, Pereyra A, Moreno N, Galas M. 2003. Multiple antibiotic-resistance mechanisms including a novel combination of extended-spectrum  $\beta$ -lactamases in a *Klebsiella pneumoniae* clinical strain isolated in Argentina. J Antimicrob Chemother **52**:36–42..

**TABLE S2.** GenBank accession numbers of the known *qnr* sequences.

| <i>qnr</i> family  | <i>qnr</i> sequence | Accession number       |
|--------------------|---------------------|------------------------|
| <b><i>qnrA</i></b> | qnrA1               | AY070235               |
|                    | qnrA2               | AY675584               |
|                    | qnrA3               | DQ058661               |
|                    | qnrA4               | DQ058662               |
|                    | qnrA5               | DQ058663               |
|                    | qnrA6               | DQ151889               |
|                    | qnrA7               | GQ463707               |
| <b><i>qnrB</i></b> | qnrB1               | DQ351241               |
|                    | qnrB2               | DQ351242               |
|                    | qnrB3               | DQ303920               |
|                    | qnrB4               | DQ303921               |
|                    | qnrB5               | DQ303919               |
|                    | qnrB6               | EF520349               |
|                    | qnrB7               | EU043311               |
|                    | qnrB8               | EU043312               |
|                    | qnrB9               | EF526508               |
|                    | qnrB10              | DQ631414               |
|                    | qnrB11              | EF653270               |
|                    | qnrB12              | AM774474               |
|                    | qnrB13              | EU273755               |
|                    | qnrB14              | EU273757               |
|                    | qnrB15              | EU302865               |
|                    | qnrB16              | EU136183               |
|                    | qnrB17              | AM919398               |
|                    | qnrB18              | AM919399               |
|                    | qnrB19              | EU432277               |
|                    | qnrB20              | AB379831               |
|                    | qnrB21              | FJ611948               |
|                    | qnrB22              | FJ981621               |
|                    | qnrB23              | FJ981622               |
|                    | qnrB24              | HM192542               |
|                    | qnrB25              | HQ172108               |
|                    | qnrB26              | HQ386846               |
|                    | qnrB27              | HM439641               |
|                    | qnrB28              | HM439643               |
|                    | qnrB29              | HM439649               |
|                    | qnrB30              | HM439650               |
|                    | qnrB31              | HQ418999               |
|                    | qnrB32              | JN173054               |
|                    | qnrB33              | JN173055               |
|                    | qnrB34              | JN173056               |
|                    | qnrB35              | JN173057               |
|                    | qnrB36              | JN173058               |
|                    | qnrB37              | JN173059               |
|                    | qnrB38              | JN173060               |
|                    | qnrB39              | NG_050501 <sup>a</sup> |
|                    | qnrB40              | JN166689               |
|                    | qnrB41              | JN166690               |
|                    | qnrB42              | JN680743               |
|                    | qnrB43              | JQ349151               |
|                    | qnrB44              | JQ349153               |
|                    | qnrB45              | JQ349152               |

|                     |          |          |
|---------------------|----------|----------|
| qnrB46              | JQ349154 |          |
| qnrB47              | JQ349155 |          |
| qnrB48              | JQ762640 |          |
| qnrB49              | JQ582718 |          |
| qnrB50              | JX440357 |          |
| qnrB51              | JX440358 |          |
| qnrB52              | EF488762 |          |
| qnrB53              | HQ704413 |          |
| qnrB54              | HE820727 |          |
| qnrB55              | KF730650 |          |
| qnrB56              | JX259317 |          |
| qnrB57              | JX259318 |          |
| qnrB58              | JX259319 |          |
| qnrB59              | JX259320 |          |
| qnrB60              | AB734055 |          |
| qnrB61              | AB734053 |          |
| qnrB62              | JX987101 |          |
| qnrB64              | KC580653 |          |
| qnrB65              | KC580654 |          |
| qnrB66              | KC580655 |          |
| qnrB67              | KC580656 |          |
| qnrB68              | KC580657 |          |
| qnrB69              | KC580658 |          |
| qnrB70              | KC580659 |          |
| qnrB71              | KC580660 |          |
| qnrB72              | KC741443 |          |
| qnrB73              | KF443075 |          |
| qnrB74              | KJ415247 |          |
| qnrB75              | KF207591 |          |
| qnrB76              | KM985469 |          |
| qnrB77              | KM985470 |          |
| qnrB78 <sup>b</sup> | KM985471 |          |
| qnrB80              | KM985473 |          |
| <hr/>               |          |          |
| <b>qnrC</b>         | qnrC1    | EU917444 |
| <hr/>               |          |          |
| <b>qnrD</b>         | qnrD1    | FJ228229 |
|                     | qnrD2    | KF055448 |
| <hr/>               |          |          |
| <b>qnrS</b>         | qnrS1    | AB187515 |
|                     | qnrS2    | DQ485530 |
|                     | qnrS3    | EU077611 |
|                     | qnrS4    | FJ418153 |
|                     | qnrS5    | HQ631377 |
|                     | qnrS6    | HQ631376 |
|                     | qnrS7    | KF730651 |
|                     | qnrS8    | KF730652 |
|                     | qnrS9    | KF732714 |
| <hr/>               |          |          |
| <b>qnrVC</b>        | qnrVC1   | EU436855 |
|                     | qnrVC3   | HM015626 |
|                     | qnrVC4   | GQ891757 |
|                     | qnrVC5   | JN408080 |
|                     | qnrVC6   | KC202804 |
|                     | qnrVC7   | KM555152 |
|                     | <hr/>    |          |

<sup>a</sup> The record NZ\_ABWL02000005 (<http://www.lahey.org/qnrstudies/>) was removed by RefSeq staff.

<sup>b</sup> The *qnrB79* allele (KM985472) is 100% identical to *qnrB78* and was not considered.

**Table S3.** The taxa names of the trees depicted in Fig. 2 (Maximum Likelihood) and Fig. S3 ( Neighbor-Joining) are indicated from top (number 1) to bottom (number 104) of the corresponding tree. The *qnr* families are indicated with different background colors and *qnrE1* is shown in red.

| Number | Maximum Likelihood tree | Neighbor-Joining tree |
|--------|-------------------------|-----------------------|
| 1      | <i>qnrB43</i>           | <i>qnrB43</i>         |
| 2      | <i>qnrB57</i>           | <i>qnrB57</i>         |
| 3      | <i>qnrB76</i>           | <i>qnrB76</i>         |
| 4      | <i>qnrB13</i>           | <i>qnrB13</i>         |
| 5      | <i>qnrB24</i>           | <i>qnrB24</i>         |
| 6      | <i>qnrB29</i>           | <i>qnrB29</i>         |
| 7      | <i>qnrB48</i>           | <i>qnrB48</i>         |
| 8      | <i>qnrB23</i>           | <i>qnrB23</i>         |
| 9      | <i>qnrB45</i>           | <i>qnrB45</i>         |
| 10     | <i>qnrB54</i>           | <i>qnrB54</i>         |
| 11     | <i>qnrB49</i>           | <i>qnrB49</i>         |
| 12     | <i>qnrB20</i>           | <i>qnrB20</i>         |
| 13     | <i>qnrB2</i>            | <i>qnrB2</i>          |
| 14     | <i>qnrB52</i>           | <i>qnrB52</i>         |
| 15     | <i>qnrB9</i>            | <i>qnrB9</i>          |
| 16     | <i>qnrB32</i>           | <i>qnrB32</i>         |
| 17     | <i>qnrB78</i>           | <i>qnrB78</i>         |
| 18     | <i>qnrB7</i>            | <i>qnrB7</i>          |
| 19     | <i>qnrB44</i>           | <i>qnrB44</i>         |
| 20     | <i>qnrB64</i>           | <i>qnrB64</i>         |
| 21     | <i>qnrB41</i>           | <i>qnrB41</i>         |
| 22     | <i>qnrB15</i>           | <i>qnrB15</i>         |
| 23     | <i>qnrB14</i>           | <i>qnrB14</i>         |
| 24     | <i>qnrB58</i>           | <i>qnrB58</i>         |
| 25     | <i>qnrB18</i>           | <i>qnrB18</i>         |
| 26     | <i>qnrB30</i>           | <i>qnrB30</i>         |
| 27     | <i>qnrB16</i>           | <i>qnrB16</i>         |
| 28     | <i>qnrB80</i>           | <i>qnrB80</i>         |
| 29     | <i>qnrB42</i>           | <i>qnrB31</i>         |
| 30     | <i>qnrB1</i>            | <i>qnrB53</i>         |
| 31     | <i>qnrB74</i>           | <i>qnrB42</i>         |
| 32     | <i>qnrB6</i>            | <i>qnrB1</i>          |
| 33     | <i>qnrB3</i>            | <i>qnrB74</i>         |
| 34     | <i>qnrB75</i>           | <i>qnrB6</i>          |
| 35     | <i>qnrB26</i>           | <i>qnrB3</i>          |
| 36     | <i>qnrB77</i>           | <i>qnrB75</i>         |
| 37     | <i>qnrB17</i>           | <i>qnrB26</i>         |
| 38     | <i>qnrB66</i>           | <i>qnrB77</i>         |
| 39     | <i>qnrB31</i>           | <i>qnrB17</i>         |
| 40     | <i>qnrB53</i>           | <i>qnrB66</i>         |
| 41     | <i>qnrB5</i>            | <i>qnrB5</i>          |
| 42     | <i>qnrB19</i>           | <i>qnrB19</i>         |
| 43     | <i>qnrB10</i>           | <i>qnrB10</i>         |
| 44     | <i>qnrB56</i>           | <i>qnrB56</i>         |
| 45     | <i>qnrB59</i>           | <i>qnrB59</i>         |
| 46     | <i>qnrB62</i>           | <i>qnrB62</i>         |
| 47     | <i>qnrB46</i>           | <i>qnrB46</i>         |
| 48     | <i>qnrB47</i>           | <i>qnrB47</i>         |
| 49     | <i>qnrB50</i>           | <i>qnrB50</i>         |



|           |              |              |
|-----------|--------------|--------------|
| 50        | qnrB40       | qnrB40       |
| 51        | qnrB51       | qnrB51       |
| 52        | qnrB36       | qnrB61       |
| 53        | qnrB71       | qnrB71       |
| 54        | qnrB61       | qnrB36       |
| 55        | qnrB67       | qnrB67       |
| 56        | qnrB70       | qnrB68       |
| 57        | qnrB68       | qnrB70       |
| 58        | qnrB72       | qnrB72       |
| 59        | qnrB28       | qnrB28       |
| 60        | qnrB33       | qnrB33       |
| 61        | qnrB27       | qnrB27       |
| 62        | qnrB73       | qnrB73       |
| 63        | qnrB8        | qnrB8        |
| 64        | qnrB21       | qnrB21       |
| 65        | qnrB25       | qnrB25       |
| 66        | qnrB35       | qnrB38       |
| 67        | qnrB38       | qnrB35       |
| 68        | qnrB60       | qnrB60       |
| 69        | qnrB39       | qnrB39       |
| 70        | qnrB4        | qnrB4        |
| 71        | qnrB55       | qnrB55       |
| 72        | qnrB22       | qnrB22       |
| 73        | qnrB65       | qnrB65       |
| 74        | qnrB37       | qnrB37       |
| 75        | qnrB69       | qnrB69       |
| 76        | qnrB12       | qnrB12       |
| 77        | qnrB11       | qnrB11       |
| 78        | qnrB34       | qnrB34       |
| <b>79</b> | <b>qnrE1</b> | <b>qnrE1</b> |
| 80        | qnrD1        | qnrD1        |
| 81        | qnrD2        | qnrD2        |
| 82        | qnrA4        | qnrS3        |
| 83        | qnrA5        | qnrS8        |
| 84        | qnrA3        | qnrS1        |
| 85        | qnrA6        | qnrS9        |
| 86        | qnrA7        | qnrS4        |
| 87        | qnrA1        | qnrS7        |
| 88        | qnrA2        | qnrS5        |
| 89        | qnrS8        | qnrS2        |
| 90        | qnrS1        | qnrS6        |
| 91        | qnrS3        | qnrA1        |
| 92        | qnrS9        | qnrA2        |
| 93        | qnrS4        | qnrA6        |
| 94        | qnrS7        | qnrA7        |
| 95        | qnrS5        | qnrA5        |
| 96        | qnrS2        | qnrA4        |
| 97        | qnrS6        | qnrA3        |
| 98        | qnrC1        | qnrC1        |
| 99        | qnrVC1       | qnrVC6       |
| 100       | qnrVC3       | qnrVC1       |
| 101       | qnrVC6       | qnrVC3       |
| 102       | qnrVC7       | qnrVC5       |
| 103       | qnrVC4       | qnrVC7       |
| 104       | qnrVC5       | qnrVC4       |
